# Supplementary material
Source: PubMed Central journal article supplement (PMC7953573)
Supplement: NIHMS1530742-supplement-1.pdf [file NIHMS1530742-supplement-1.pdf]

Supplementary Table 1. Correlational associations of all within-person random slopes at the between level

|                                                                  | 1    | 2    | 3    | 4    | 5          | 6           | 7    | 8    | 9    | 10         | 11  | 12 |
|------------------------------------------------------------------|------|------|------|------|------------|-------------|------|------|------|------------|-----|----|
| 1 $B_{\text{Grandiosity} \rightarrow \text{Dominance}}$          | -    |      |      |      |            |             |      |      |      |            |     |    |
| 2 $B_{\text{Grandiosity} \rightarrow \text{Warmth}}$             | .12  | -    |      |      |            |             |      |      |      |            |     |    |
| 3 $B_{\text{Vulnerability} \rightarrow \text{Dominance}}$        | .03  | -.03 | -    |      |            |             |      |      |      |            |     |    |
| 4 $B_{\text{Vulnerability} \rightarrow \text{Warmth}}$           | -.06 | -.08 | -.20 | -    |            |             |      |      |      |            |     |    |
| 5 $B_{\text{Dominance\_Other} \rightarrow \text{Grandiosity}}$   | -.13 | .07  | .02  | .09  | -          |             |      |      |      |            |     |    |
| 6 $B_{\text{Dominance\_Other} \rightarrow \text{Vulnerability}}$ | -.06 | .02  | .14  | .22  | .22        | -           |      |      |      |            |     |    |
| 7 $B_{\text{Warmth\_Other} \rightarrow \text{Grandiosity}}$      | -.06 | .18  | .06  | -.00 | .00        | .09         | -    |      |      |            |     |    |
| 8 $B_{\text{Warmth\_Other} \rightarrow \text{Vulnerability}}$    | .00  | .16  | -.07 | -.00 | .15        | .01         | -.12 | -    |      |            |     |    |
| 9 $B_{\text{Dominance\_Other} \rightarrow \text{Dominance}}$     | .04  | .13  | .02  | .02  | <b>.49</b> | .17         | -.03 | .12  | -    |            |     |    |
| 10 $B_{\text{Dominance\_Other} \rightarrow \text{Warmth}}$       | .06  | .24  | .09  | .04  | -.01       | <b>-.34</b> | .04  | -.02 | .09  | -          |     |    |
| 11 $B_{\text{Warmth\_Other} \rightarrow \text{Dominance}}$       | .02  | -.18 | -.02 | .07  | .10        | .05         | .14  | .11  | -.01 | <b>.27</b> | -   |    |
| 12 $B_{\text{Warmth\_Other} \rightarrow \text{Warmth}}$          | .14  | -.14 | .02  | .20  | .03        | .10         | .03  | .13  | .08  | -.06       | .02 | -  |

*Note.* Bolded values are those for which the credibility interval does not contain zero.
